# Supplementary material
Source: ML conference proceedings conference paper supplement (https://openaccess.thecvf.com/content/CVPR_2019/html/Zhang_Local_Temporal_Bilinear_CVPR_2019_paper.html)
Supplement: Supplementary file 1 [file Zhang_Local_Temporal_Bilinear_CVPR_2019_supplemental.pdf]

Archive with 1 entries (1 files):
- demo-bilinear.m4v
